# Supplementary material
Source: publisher figshare collection journal article supplement (https://future-science-group.figshare.com/ndownloader/files/34105556)
Supplement: Supplementary file 1 [file 34105556]

## Sheet: Sheet1
Table S1-A: Noticeable updates of this study when compared with Rodrigues-Soares et al. (2018) - doi: 10.1038/s41397-018-0015-7.
	Rodrigues-Soares et al. (2018)	This study
Focus	Allele frequencies	Research results
Number of analyzed biomarkers	39	80
Number of individuals	51747	3819233
Number of healthy volunteers	51747	3616246 (347924 without considering Redome - Torres et al. 2017)
Years covered	1968-2016	1968-2020
